# Supplementary material
Source: PubMed Central journal article supplement (PMC3116414)
Supplement: 1103270108_pnas.1103270108_SI.pdf [file 1103270108_pnas.1103270108_SI.pdf]

# Supporting Information

Jensen et al. 10.1073/pnas.1103270108

## SI Methods

**Recombinant Protein Production and Purification.** Cloning, expression, and purification of the isotopically labeled isolated measles virus N<sub>TAIL</sub> domain and the C-terminal domain of P (sometimes known as XD) were described previously (1, 2). Experiments were carried out in 50 mM phosphate buffer at pH 7 with 50 mM NaCl.

**Cloning, Expression, and Purification of Intact Measles Virus Nucleocapsids.** The cloning procedure of the measles virus nucleoprotein gene (strain Edmonston B) into the expression vector pET22b (+) was described previously (3). The vector was transformed into *Escherichia coli* Rosetta™ (λDE3)/pRARE strain (Novagen) for expression of the recombinant protein. Unlabeled protein was obtained in Luria-Bertani medium, while the uniformly isotopically labeled <sup>15</sup>N and <sup>15</sup>N/<sup>13</sup>C protein samples were produced in M9 minimal medium supplemented with 1.0 g/L of <sup>15</sup>NH<sub>4</sub>Cl, 2.0 g/L of <sup>13</sup>C glucose and Minimum Essential Medium (MEM) vitamins (Gibco). The cells were grown at 37 °C until the optical density (OD) at 600 nm reached 0.6 and the protein expression was then induced with 0.5 mM isopropyl-1-thio-β-D-galactopyranoside (IPTG) for 14–16 h at 30 °C. Cells were harvested by centrifugation and then suspended in lysis buffer (10 mL/L of bacteria culture) containing 20 mM Tris-HCl, 150 mM NaCl at pH 7.5 (buffer A), supplemented with 1 mM MgSO<sub>4</sub>, complete™ protease inhibitor cocktail tablets (Roche), DNase I (Sigma), and lysozyme (Fluka) and incubated for 30 min on ice. Cells were completely disrupted by sonication on ice and the debris was removed by centrifugation for 20 min at 16,000 × g, 4 °C. Typically, 5–8 mL of the supernatant was layered onto a continuous gradient of 23–26 mL of CsCl (20–40% w/w in buffer A). The gradient was centrifuged at

25,000 rpm for 15 h at 12 °C (SW28 Beckman rotor using UltraClear™ tubes of 38.5 mL), and the visible nucleocapsid band was collected by puncturing the tube. The sample was dialyzed into buffer A and layered onto a glycerol cushion 15% (v/v in buffer A) and then centrifuged as described for the CsCl gradient. The capsid on the bottom was resuspended in 50 mM sodium phosphate buffer pH 7.0 with 50 mM NaCl and dialyzed in the same buffer overnight. Sample was centrifuged at 16,000 × g, 1 min at 4 °C and the quality of the capsid preparation in the supernatant was checked by SDS-PAGE and electron microscopy (negative staining) as previously described (3). Protein concentrations were measured by absorbance spectroscopy using BioRad Bradford's method based-protein assay. The yield of <sup>15</sup>N- and <sup>15</sup>N/<sup>13</sup>C-labeled measles virus nucleoprotein was about 78 mg/L. The protein solution was frozen in liquid nitrogen and stored at –80 °C at final concentration ranges of 0.2 to 0.4 mM. Trypsin-digested nucleocapsids were obtained as described previously and comprised residues 14–405 (4).

**Capsid EM Negative Staining (Sample Quality Control).** Noncleaved and cleaved capsids were resuspended and dialyzed in the same buffer used for the NMR studies (e.g., 50 mM sodium phosphate buffer pH 7.0 50 mM NaCl). Samples were centrifuged at 16,000 × g, 1 min, 4 °C and the quality of the capsid preparation in the supernatant was checked by SDS-PAGE and electron microscopy. Briefly, the capsids were diluted to a concentration of about 0.1 mg/mL and were adsorbed onto the clean face of a carbon film on mica, negatively stained with 2% (w/v) uranyl acetate and observed under low-dose conditions with a JEOL 1200 EX II microscope at 100 kV and a nominal magnification of 40,000X.

1. Longhi S, et al. (2003) The C-terminal domain of the measles virus nucleoprotein is intrinsically disordered and folds upon binding to the C-terminal moiety of the phosphoprotein. *J Biol Chem* 278:18638–18648.
2. Gely S, et al. (2010) Solution structure of the C-terminal X domain of the measles virus phosphoprotein and interaction with the intrinsically disordered C-terminal domain of the nucleoprotein. *J Mol Recognit* 23:435–447.
3. Desfosses A, Goret G, Farias Estrozi L, Ruigrok RWH, Gutsche I (2011) Nucleoprotein-RNA orientation in the measles virus nucleocapsid by three-dimensional electron microscopy. *J Virol* 85:1391–1395.
4. Schoehn G, et al. (2004) The 12 A structure of trypsin-treated measles virus N-RNA. *J Mol Biol* 339:301–312.
